# Supplementary material for: Water relations traits of C4 grasses depend on phylogenetic lineage, photosynthetic pathway, and habitat water availability
Source: PubMed Central journal article supplement (PMC4321540; doi:10.1093/jxb/eru430), 2014-12-12
Supplement: supp_eru430_jexbot132845_file001.pdf [file supp_eru430_jexbot132845_file001.pdf]

# Water relations traits of C<sub>4</sub> grasses depend on phylogenetic lineage, photosynthetic pathway and habitat water availability

Hui Liu, Colin P. Osborne

## Supplementary data

**Table S1** Information about the 33 species used in the glasshouse experiment. Annual or perennial categories based on Kew Grassbase (Clayton *et al.*, 2006 onwards). “inter” in habitat type means “intermediate” species.

| Clade                          | C <sub>4</sub> subtype | Species                        | Source <sup>1</sup>       | Seed ID        | Annual/<br>perennial | Habitat<br>type |
|--------------------------------|------------------------|--------------------------------|---------------------------|----------------|----------------------|-----------------|
| <b>Subfamily Panicoideae</b>   |                        |                                |                           |                |                      |                 |
| Paspaleae                      | NADP-me                | <i>Axonopus compressus</i>     | A                         | PI406648       | P                    | wet             |
|                                | NADP-me                | <i>Panicum antidotale</i>      | B                         | CIAT6039       | P                    | inter           |
|                                | NADP-me                | <i>Paspalum dilatatum</i>      | A                         | PI477099       | P                    | inter           |
| Paniceae                       | NAD-me                 | <i>Alloteropsis cimicina</i>   | C                         | AusTRCF 59560  | A/P                  | inter           |
|                                | PCK                    | <i>Alloteropsis semialata</i>  | D                         |                | P                    | arid            |
|                                | PCK                    | <i>Brachiaria decumbens</i>    | C                         | AusTRCF 72793  | P                    | inter           |
|                                | PCK                    | <i>Brachiaria nigropedata</i>  | C                         | AusTRCF 319409 | P                    | arid            |
|                                | NADP-me                | <i>Digitaria eriantha</i>      | C                         | AusTRCF 319398 | P                    | inter           |
|                                | PCK                    | <i>Melinis ambigua</i>         | C                         | AusTRCF 52263  | P                    | inter           |
|                                | PCK                    | <i>Melinis repens</i>          | E                         |                | A/P                  | inter           |
|                                | NADP-me                | <i>Pennisetum clandestinum</i> | C                         | AusTRCF 60072  | P                    | wet             |
|                                | NAD-me                 | <i>Panicum virgatum</i>        | A                         | PI476292       | P                    | inter           |
|                                | NADP-me                | <i>Setaria incrassata</i>      | C                         | AusTRCF 24582  | P                    | wet             |
|                                | PCK                    | <i>Urochloa mosambicensis</i>  | C                         | AusTRCF 320249 | P                    | inter           |
|                                | PCK                    | <i>Urochloa maxima</i>         | A                         | PI259549       | P                    | wet             |
|                                | Andropogoneae          | NADP-me                        | <i>Andropogon gayanus</i> | C              | AusTRCF24575         | P               |
| NADP-me                        |                        | <i>Bothriochloa pertusa</i>    | C                         | AusTRCF 106426 | P                    | inter           |
| NADP-me                        |                        | <i>Heteropogon contortus</i>   | A                         | Grif 15979     | P                    | inter           |
| NADP-me                        |                        | <i>Imperata cylindrica</i>     | E                         |                | P                    | inter           |
| NADP-me                        |                        | <i>Ischaemum molle</i>         | C                         | AusTRCF84176   | P                    | inter           |
| NADP-me                        |                        | <i>Arundinella hirta</i>       | A                         | PI263693       | P                    | wet             |
| <b>Subfamily Chloridoideae</b> |                        |                                |                           |                |                      |                 |
| Cynodonteae                    | NAD-me                 | <i>Cynodon dactylon</i>        | C                         | AusTRCF 37896  | P                    | inter           |
|                                | PCK                    | <i>Chloris elata</i>           | C                         | AusTRCF 53926  | P                    | inter           |
|                                | PCK                    | <i>Chloris gayana</i>          | C                         | AusTRCF 319691 | P                    | wet             |
|                                | PCK                    | <i>Chloris roxburghiana</i>    | C                         | AusTRCF 59653  | P                    | arid            |
|                                | PCK                    | <i>Dactyloctenium aegyptum</i> | F                         | 91323          | A                    | arid            |

|               |        |                                 |   |               |   |       |
|---------------|--------|---------------------------------|---|---------------|---|-------|
|               | PCK    | <i>Dactyloctenium scindicum</i> | C | AusTRCF25452  | P | arid  |
| Eragrostideae | NAD-me | <i>Eragrostis curvula</i>       | C | AusTRCF 30368 | P | inter |
|               | NAD-me | <i>Enneapogon scoparius</i>     | C | AusTRCF59846  | P | arid  |
|               | NAD-me | <i>Fingerhuthia africana</i>    | C | AusTRCF98990  | P | arid  |
| Zoysieae      | NAD-me | <i>Sporobolus nebulosus</i>     | G | 0082459       | P | inter |
|               | PCK    | <i>Spartina pectinata</i>       | D | 30925         | P | wet   |
|               | PCK    | <i>Zoysia japonica</i>          | F | 91937         | P | inter |

<sup>1</sup>Suppliers: A, US Department of Agriculture National Plant Germplasm System (NPGS), BARC-West Beltsville, MD, USA; B, International Center for Tropical Agriculture (CIAT), Genetic Resources Program (GRP); C, Australian Plant Genetic Resource Information Service (AusPGRIS), Queensland, Australia; D, collected in South Africa, stored in the University of Sheffield; E, Silverhill seeds, Cape Town, South Africa; F, Herbiseed, Twyford, UK; G, grown in Tapton Experimental Gardens of the University of Sheffield by Taylor *et al.* (2010).

**Table S2** (a) Conventional principal component analysis (PCA) and (b) phylogenetic PCA (PPCA) for the first two principal components based on 29 plant traits of 33  $C_4$  grasses. PC loadings and the percentage of variance explained by the first two PCs are reported. For each PC, the first seven variables with highest loadings are in bold. See trait abbreviations in Fig. 1.

| (a) PCA               |              |              | (b) PPCA            |              |              |
|-----------------------|--------------|--------------|---------------------|--------------|--------------|
| Variable              | PC1          | PC2          | Variable            | PC1          | PC2          |
| LD                    | <b>-0.33</b> | 0.07         | LD                  | <b>-0.83</b> | 0.19         |
| LDMC                  | <b>-0.31</b> | 0.10         | LDMC                | <b>-0.82</b> | 0.24         |
| LA                    | <b>-0.30</b> | -0.17        | SLA                 | <b>0.66</b>  | 0.27         |
| Height                | <b>-0.28</b> | -0.15        | Height              | <b>-0.65</b> | -0.40        |
| TLP                   | <b>-0.28</b> | 0.12         | WUE <sub>i</sub>    | <b>-0.62</b> | 0.46         |
| SLA                   | <b>0.27</b>  | 0.14         | LA                  | <b>-0.62</b> | <b>-0.62</b> |
| $\epsilon$            | <b>-0.26</b> | 0.10         | TLP                 | <b>-0.60</b> | 0.22         |
| GL                    | 0.06         | <b>-0.33</b> | LV                  | -0.53        | <b>-0.71</b> |
| SW                    | 0.03         | <b>-0.32</b> | LT                  | 0.21         | <b>-0.59</b> |
| Seed                  | -0.04        | <b>-0.29</b> | LW                  | -0.46        | <b>-0.56</b> |
| LT                    | 0.06         | <b>-0.28</b> | $K_{\text{leaf}}$   | 0.46         | <b>-0.56</b> |
| LW                    | -0.20        | <b>-0.26</b> | $g_s$               | 0.55         | <b>-0.54</b> |
| X1                    | 0.12         | <b>0.26</b>  | $\Psi_{\text{sat}}$ | 0.23         | <b>0.51</b>  |
| SD                    | -0.18        | <b>0.23</b>  |                     |              |              |
| Total variance %      | 23%          | 18%          |                     | 24%          | 16%          |
| Cumulative variance % | 23%          | 41%          |                     | 24%          | 40%          |

**Table S3** Parameters derived from PV curves for different C<sub>4</sub> subtypes of two subfamilies in Figure 3. The highest and lowest values for each index are in bold. Abbreviations are the same as in Table 1.

|               | <i>n</i> | $\Psi_{\text{sat}}$<br>(MPa) | $\Psi_{\text{osat}}$<br>(MPa) | TLP<br>(MPa)  | RWC at TLP<br>(%) | $\varepsilon$<br>(MPa) |
|---------------|----------|------------------------------|-------------------------------|---------------|-------------------|------------------------|
| Chloridoideae |          |                              |                               |               |                   |                        |
| NAD-me        | 25       | <b>-0.197</b>                | -0.937                        | -1.048        | <b>90.68</b>      | <b>0.097</b>           |
| PCK           | 35       | -0.195                       | <b>-1.152</b>                 | <b>-1.316</b> | 91.54             | <b>0.139</b>           |
| Panicoidaeae  |          |                              |                               |               |                   |                        |
| NAD-me        | 10       | <b>-0.152</b>                | <b>-0.802</b>                 | <b>-0.892</b> | 91.62             | 0.100                  |
| NADP-me       | 60       | -0.159                       | -1.052                        | -1.193        | <b>91.72</b>      | 0.110                  |
| PCK           | 35       | -0.153                       | -0.972                        | -1.101        | 91.45             | 0.109                  |

### Figure legends

**Fig. S1.** (a) Relationship between MAP and water score, and (b) distribution of MAP for each habitat type for the 33 grass species used in the greenhouse experiment. Subfamilies are Chloridoideae (black) and Panicoideae (grey). Regression line in (a):  $y = 193 \times x + 488$  ( $R^2 = 0.11^{***}$ ).

**Fig. S2.** Phylogenetic relationships of the 33 species used in the greenhouse experiment. Subfamilies and lineages are labelled. C<sub>4</sub> photosynthetic subtypes (PT) are shown in different shapes: PCK (triangle), NAD-me (square) and NADP-me (round).

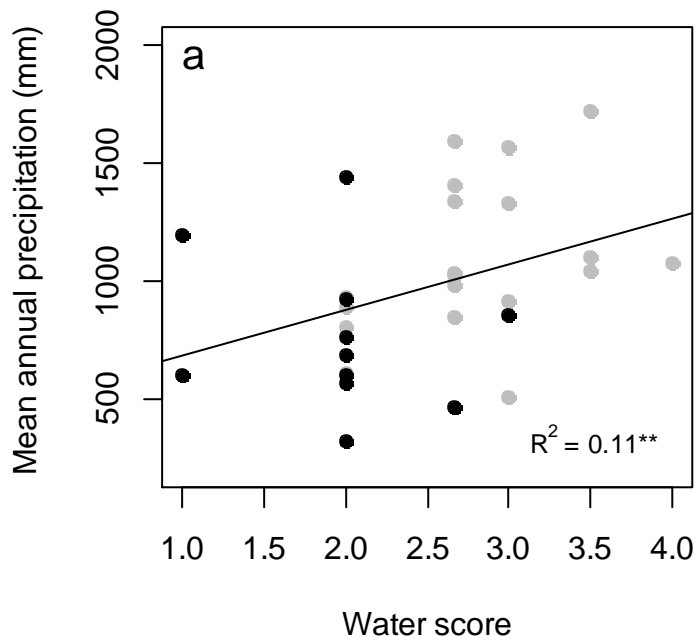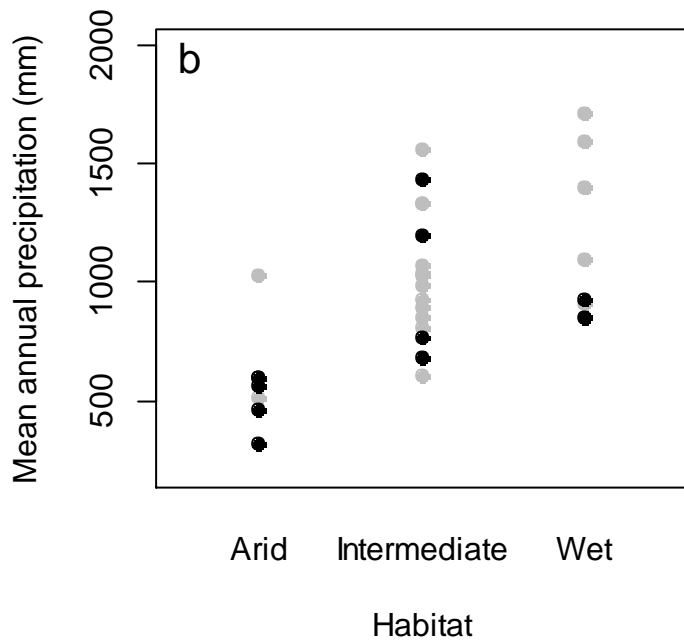

**Fig. S1.** Liu *et al.*

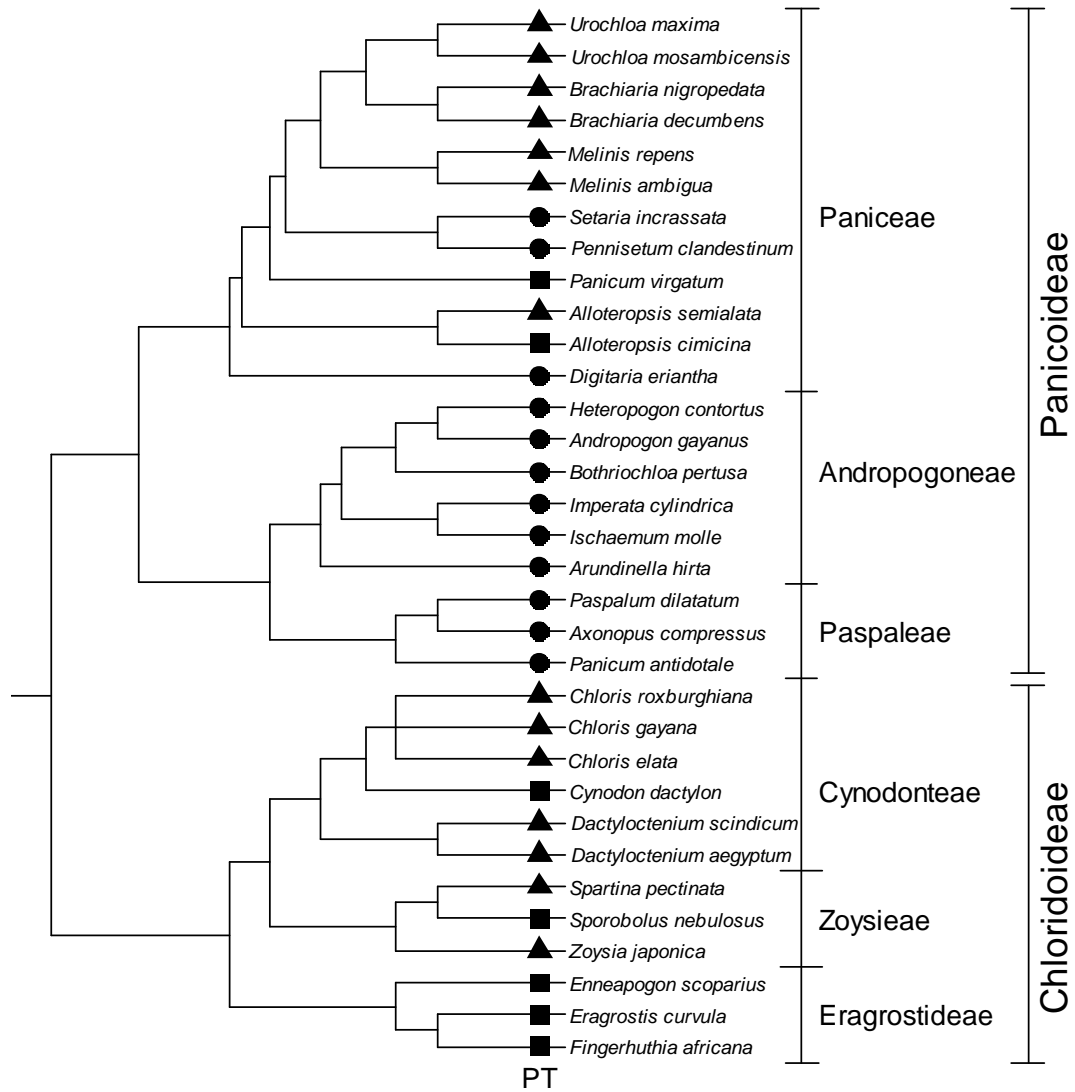

Fig. S2. Liu *et al.*
